# Supplementary material for: Association of glycation gap with hypoglycemia CGM indices in Japanese patients with type 2 diabetes mellitus
Source: Research Square preprint supplement (doi:10.21203/rs.3.rs-5739052/v1), 2025-01-14
Supplement: Supplementary file 2 [file 4353ddccde3b70b475c02a03.docx]

**Supplementary Table 1. DTR-QOL and lifestyle factors by glycation gap tertile.**

|  | Low (<0.16) n=329 | Moderate (≥0.16 to <0.60) n=333 | High (≥0.60) n=337 | *P* value |
| --- | --- | --- | --- | --- |
| Lifestyle factors |  |  |  |  |
| Q1. How often do you consume alcohol? (Did not drink) | 149 (45.8) | 169 (50.9) | 172 (51.2) | 0.403 |
| Q2. Do you smoke cigarettes? (Yes) | 66 (20.1) | 59 (17.7) | 60 (17.8) | 0.334 |
| Q3. How many meals do you have a day? (3 times) | 289 (88.9) | 301 (90.7) | 307 (91.4) | 0.478 |
| Q4. Do you take snacks? (1 time) | 171 (74.3) | 167 (67.6) | 187 (71.9) | 0.431 |
| Q5. Do you eat sweet foods other than meals (e.g., fruit or sweets) after dinner? (Yes) | 165 (50.8) | 197 (59.3) | 193 (57.4) | 0.068 |
| Q7. Are you currently a shift worker? (Yes) | 44 (12.6) | 44 (13.3) | 56 (16.7) | 0.274 |
| Q8. Did you have hypoglycemia in last month? (Yes) | 14 (4.3) | 14 (4.2) | 39 (11.6) | <0.001 |
| DTR-QOL |  |  |  |  |
| Factor 1: Burden on social activities and daily activities | 81.3 ± 16.7 | 80.4 ± 18.1 | 77.1 ± 18.4 | 0.005 |
| Factor 2: Anxiety and dissatisfaction with treatment | 70.1 ± 20.9 | 68.3 ± 22.4 | 61.9 ± 22.4 | <0.001 |
| Factor 3: Hypoglycemia | 84.4 ± 21.7 | 83.1 ± 23.3 | 80.1 ± 23.8 | 0.044 |
| Factor 4: Satisfaction with treatment | 61.0 ± 20.9 | 60.5 ± 21.4 | 55.5 ± 20.2 | <0.001 |
| Total | 75.9 ± 15.3 | 74.7 ± 16.6 | 70.3 ± 16.5 | <0.001 |

DTR-QOL; Diabetes therapy-related quality of life
